# Supplementary material for: PD-L1 expression on stromal tumor-infiltrating lymphocytes is a favorable prognostic factor in ovarian serous carcinoma
Source: Springer Nature journal article supplement (doi:10.1186/s13048-019-0526-0), 2019-06-17
Supplement: MOESM1 [file 16819988]

Table S1. The association between PD-L1 expression and clinicopathologic factors in all types of EOCs

|                            | Stromal PD-L1 expression |                     |         | Tumor PD-L1 expression |                     |         | Intraepithelial PD-L1 expression |                     |         |
|----------------------------|--------------------------|---------------------|---------|------------------------|---------------------|---------|----------------------------------|---------------------|---------|
|                            | Low expression (%)       | High expression (%) | p-value | Low expression (%)     | High expression (%) | p-value | Low expression (%)               | High expression (%) | p-value |
| <b>Histologic type</b>     | <b>0.015</b>             |                     |         | <b>0.585</b>           |                     |         | <b>0.292</b>                     |                     |         |
| serous                     | 111 (79.3)               | 29 (20.7)           |         | 127 (90.7)             | 13 (9.3)            |         | 121 (86.4)                       | 19 (12.6)           |         |
| mucinous                   | 45 (95.7)                | 2 (4.3)             |         | 43 (91.5)              | 4 (8.5)             |         | 44 (93.6)                        | 3 (6.4)             |         |
| endometrioid               | 13 (68.4)                | 6 (31.6)            |         | 19 (100)               | 0 (0)               |         | 17 (89.5)                        | 2 (10.5)            |         |
| clear                      | 37 (88.1)                | 5 (11.9)            |         | 38 (90.5)              | 4 (9.5)             |         | 40 (95.2)                        | 2 (4.8)             |         |
| <b>Residual tumor</b>      | <b>0.001</b>             |                     |         | <b>0.767</b>           |                     |         | <b>1.000</b>                     |                     |         |
| optimal                    | 145 (86.8)               | 22 (13.2)           |         | 156 (93.4)             | 11 (6.6)            |         | 152 (91.0)                       | 15 (9.0)            |         |
| suboptimal                 | 9 (52.9)                 | 8 (47.1)            |         | 15 (88.2)              | 2 (11.8)            |         | 15 (88.2)                        | 2 (11.8)            |         |
| <b>Tumor grade</b>         | <b>&lt; 0.001</b>        |                     |         | <b>0.277</b>           |                     |         | <b>&lt; 0.001</b>                |                     |         |
| 1                          | 52 (91.2)                | 5 (8.8)             |         | 55 (96.5)              | 2 (3.5)             |         | 54 (94.7)                        | 3 (5.3)             |         |
| 2                          | 108 (88.5)               | 14 (11.5)           |         | 109 (89.3)             | 13 (10.7)           |         | 117 (95.9)                       | 5 (4.1)             |         |
| 3                          | 46 (66.7)                | 23 (33.3)           |         | 63 (91.3)              | 6 (8.7)             |         | 51 (73.9)                        | 18 (26.1)           |         |
| <b>Tumor stage</b>         | <b>0.496</b>             |                     |         | <b>0.428</b>           |                     |         | <b>1.000</b>                     |                     |         |
| early                      | 59 (86.8)                | 9 (13.2)            |         | 65 (95.6)              | 3 (4.4)             |         | 62 (91.2)                        | 6 (8.8)             |         |
| advanced                   | 94 (81.7)                | 21 (18.3)           |         | 105 (91.3)             | 10 (8.7)            |         | 104 (90.4)                       | 11 (9.6)            |         |
| <b>Nuclear grade</b>       | <b>&lt; 0.001</b>        |                     |         | <b>1.000</b>           |                     |         | <b>0.004</b>                     |                     |         |
| mild and moderate          | 124 (90.5)               | 13 (9.5)            |         | 125 (91.2)             | 12 (8.8)            |         | 130 (94.9)                       | 7 (5.1)             |         |
| marked                     | 82 (73.9)                | 29 (26.1)           |         | 102 (91.9)             | 9 (8.1)             |         | 92 (82.9)                        | 19 (17.1)           |         |
| <b>Mitosis</b>             | <b>0.068</b>             |                     |         | <b>0.891</b>           |                     |         | <b>0.004</b>                     |                     |         |
| 0-9/10 HPFs                | 83 (89.2)                | 10 (10.8)           |         | 86 (92.5)              | 7 (7.5)             |         | 90 (96.8)                        | 3 (3.2)             |         |
| 10-24/10 HPFs              | 78 (82.1)                | 17 (17.9)           |         | 86 (90.5)              | 9 (9.5)             |         | 84 (88.4)                        | 11 (11.6)           |         |
| >=25/10 HPFs               | 45 (75.0)                | 15 (25.0)           |         | 55 (91.7)              | 5 (8.3)             |         | 48 (80.0)                        | 12 (20.0)           |         |
| <b>Chemoresponse</b>       | <b>0.164</b>             |                     |         | <b>0.167</b>           |                     |         | <b>0.279</b>                     |                     |         |
| regressive disease         | 57 (78.1)                | 16 (21.9)           |         | 65 (89.0)              | 8 (11.0)            |         | 64 (87.7)                        | 9 (12.3)            |         |
| stable/progressive disease | 83 (87.4)                | 12 (12.6)           |         | 91 (95.8)              | 4 (4.2)             |         | 89 (92.7)                        | 7 (7.3)             |         |

Table S2. The association between PD-L1 expression and clinicopathologic factors in ovarian serous carcinomas

|                            | Stromal PD-L1 expression |                     |                   | Tumor PD-L1 expression |                     |              | Intraepithelial PD-L1 expression |                     |                   |
|----------------------------|--------------------------|---------------------|-------------------|------------------------|---------------------|--------------|----------------------------------|---------------------|-------------------|
|                            | Low expression (%)       | High expression (%) | p-value           | Low expression (%)     | High expression (%) | p-value      | Low expression (%)               | High expression (%) | p-value           |
| <b>Residual tumor</b>      |                          |                     | <b>0.328</b>      |                        |                     | <b>1.000</b> |                                  |                     | <b>0.967</b>      |
| optimal                    | 74 (83.1)                | 15 (16.9)           |                   | 80 (89.9)              | 9 (10.1)            |              | 77 (86.5)                        | 12 (13.5)           |                   |
| suboptimal                 | 8 (66.7)                 | 4 (33.3)            |                   | 11 (91.7)              | 1 (8.3)             |              | 11 (91.7)                        | 1 (8.3)             |                   |
| <b>Tumor grade</b>         |                          |                     | <b>0.003</b>      |                        |                     | <b>0.449</b> |                                  |                     | <b>&lt; 0.001</b> |
| 1                          | 12 (100)                 | 0 (0)               |                   | 12 (100)               | 0 (0)               |              | 12 (100)                         | 0 (0)               |                   |
| 2                          | 66 (85.7)                | 11 (14.3)           |                   | 70 (90.9)              | 7 (9.1)             |              | 73 (94.8)                        | 4 (5.2)             |                   |
| 3                          | 33 (64.7)                | 18 (35.3)           |                   | 45 (88.2)              | 6 (11.8)            |              | 36 (70.6)                        | 15 (29.4)           |                   |
| <b>Tumor stage</b>         |                          |                     | <b>1.000</b>      |                        |                     | <b>1.000</b> |                                  |                     | <b>0.423</b>      |
| early                      | 15 (78.9)                | 4 (21.1)            |                   | 17 (89.5)              | 2 (10.5)            |              | 15 (78.9)                        | 4 (21.1)            |                   |
| advanced                   | 67 (81.7)                | 15 (18.3)           |                   | 74 (90.2)              | 8 (9.8)             |              | 73 (89.0)                        | 9 (11.0)            |                   |
| <b>Nuclear grade</b>       |                          |                     | <b>&lt; 0.001</b> |                        |                     | <b>1.000</b> |                                  |                     | <b>0.004</b>      |
| mild and moderate          | 64 (92.8)                | 5 (7.2)             |                   | 63 (91.3)              | 6 (8.7)             |              | 66 (95.7)                        | 3 (4.3)             |                   |
| marked                     | 47 (66.2)                | 24 (33.8)           |                   | 64 (90.1)              | 7 (9.9)             |              | 55 (77.5)                        | 16 (22.5)           |                   |
| <b>Mitosis</b>             |                          |                     | <b>0.204</b>      |                        |                     | <b>0.412</b> |                                  |                     | <b>0.036</b>      |
| 0-9/10 HPFs                | 26 (83.9)                | 5 (16.1)            |                   | 30 (96.8)              | 1 (3.2)             |              | 30 (96.8)                        | 1 (3.2)             |                   |
| 10-24/10 HPFs              | 51 (83.6)                | 10 (16.4)           |                   | 54 (88.5)              | 7 (11.5)            |              | 54 (88.5)                        | 7 (11.5)            |                   |
| ≥25/10 HPFs                | 34 (70.8)                | 14 (29.2)           |                   | 43 (89.6)              | 5 (10.4)            |              | 37 (77.1)                        | 11 (22.9)           |                   |
| <b>Chemoresponse</b>       |                          |                     | <b>0.128</b>      |                        |                     | <b>0.759</b> |                                  |                     | <b>0.102</b>      |
| regressive disease         | 31 (73.8)                | 11 (26.2)           |                   | 37 (88.1)              | 5 (11.9)            |              | 34 (81.0)                        | 8 (19.0)            |                   |
| stable/progressive disease | 45 (88.2)                | 6 (11.8)            |                   | 47 (92.2)              | 4 (7.8)             |              | 48 (94.1)                        | 3 (5.9)             |                   |
